# Supplementary material for: Tipping points in polymer life cycle greenhouse gas emissions
Source: Research Square preprint supplement (doi:10.21203/rs.3.rs-1715591/v1), 2022-06-28
Supplement: Supplementary file 1 [file e3b53c246d59b5a2c1229d4c.docx]

Tipping points in polymer life cycle greenhouse gas emissions

Manuscript 2022-04-06576A

Dr. Stuart Walkera*, Professor Tony Ryan OBEb,c & Professor Rachael Rothmanb,d

Plastics manufactured using biological feedstock may offer lower greenhouse gas emissions than fossil-based polymers due to the carbon captured from the atmosphere during photosythesis.

The manufacture of polymers requires resource, heat and electricity and the relative proportions of these determines their net life cycle emissions. In many cases the additional energy processing required for bio-based polymer negates the biogenic effect and they have greater net emissions than their fossil equivalents.

As the emissions intensity of electricity and heat reduces with time, tipping points occur when bio-based polymers have lower net emissions than fossil equivalents.

Here we show that tipping points have already occurred in some cases and that biologically-based polymers with negative lifetime emissions can already be manufactured in the UK.

We found that Polylactic acid (PLA) and bio-based high density polyethylene (bHDPE) currently have lower life cycle emissions than fossil equivalents. bHDPE already has net negative emissions in a current UK case (-1.97kgCO2e/kg), and PLA is forecast to reach net negative emissions in 2025 or 2030 with optimal (curated burial) or realistic (50% composting) waste treatment.

In the medium term, taking advantage of these tipping points will reduce the emissions of common polymer types. In the long term, moving to an end-of-life scenario of curated burial, and maximising the use of polymers based on high-uptake feedstock could allow the sequestration of upto a gigatonne of CO2e per year.

We considered UK scenarios with varying recycling and incineration or landfill treatment rates, and composting where appropriate. Although further research is necessary on the details of composting polymers, this work highlights that bio-based polymers may offer potential for greenhouse gas sequestration as grid electricity and heat emissions fall.

* corresponding author: [s.walker7@exeter.ac.uk](mailto:s.walker7@exeter.ac.uk)
a Faculty of Environment, Science & Economy, University of Exeter

b Grantham Centre for Sustainable Futures, University of Sheffield

c Department of Chemistry, University of Sheffield

d Department of Chemical and Biological Engineering, University of Sheffield
